# Supplementary material
Source: MDPI journal article supplement (https://www.mdpi.com/1424-2818/10/3/97)
Supplement: s1 [file s1]

## Supplementary Materials

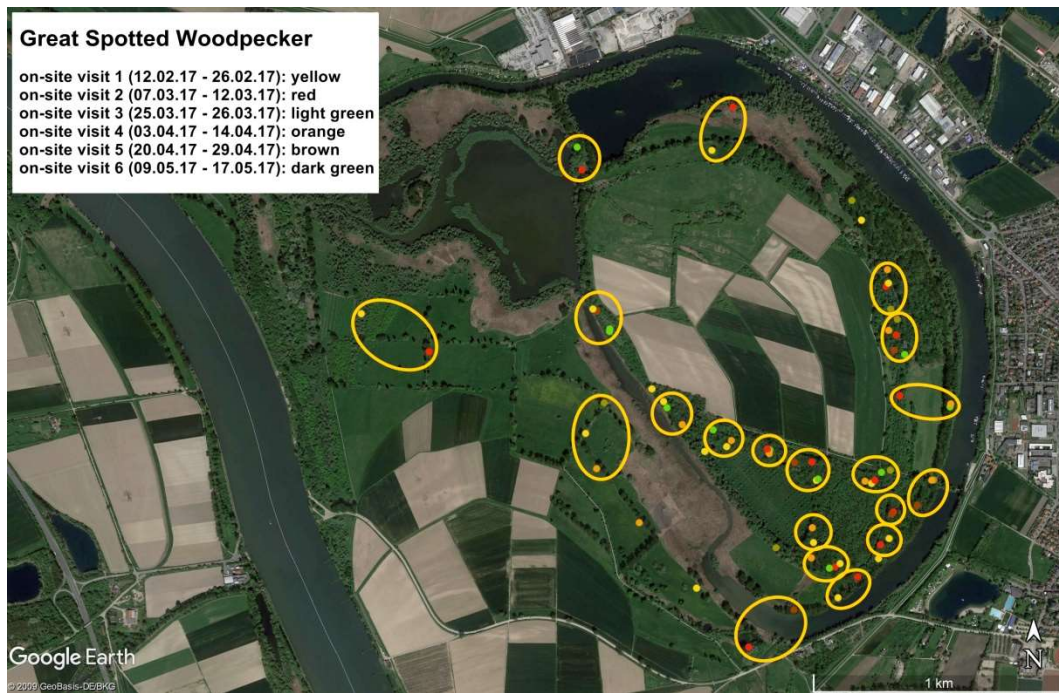

Figure S1. Species map for Great Spotted Woodpecker with single detections and defined territories.

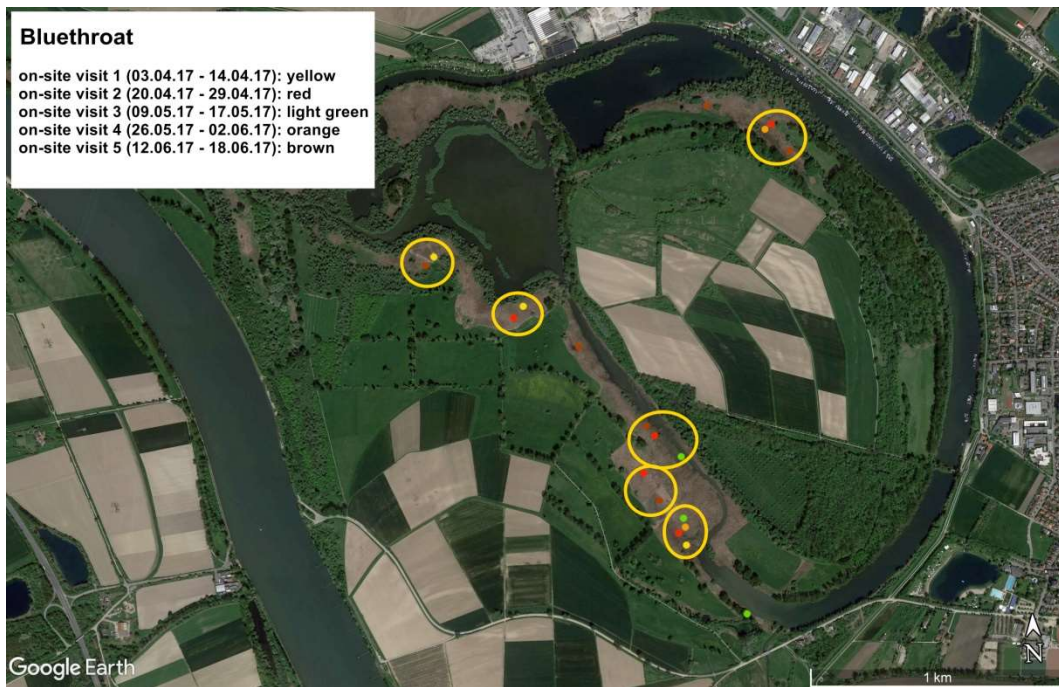

Figure S2. Species map for Bluethroat with single detections and defined territories.



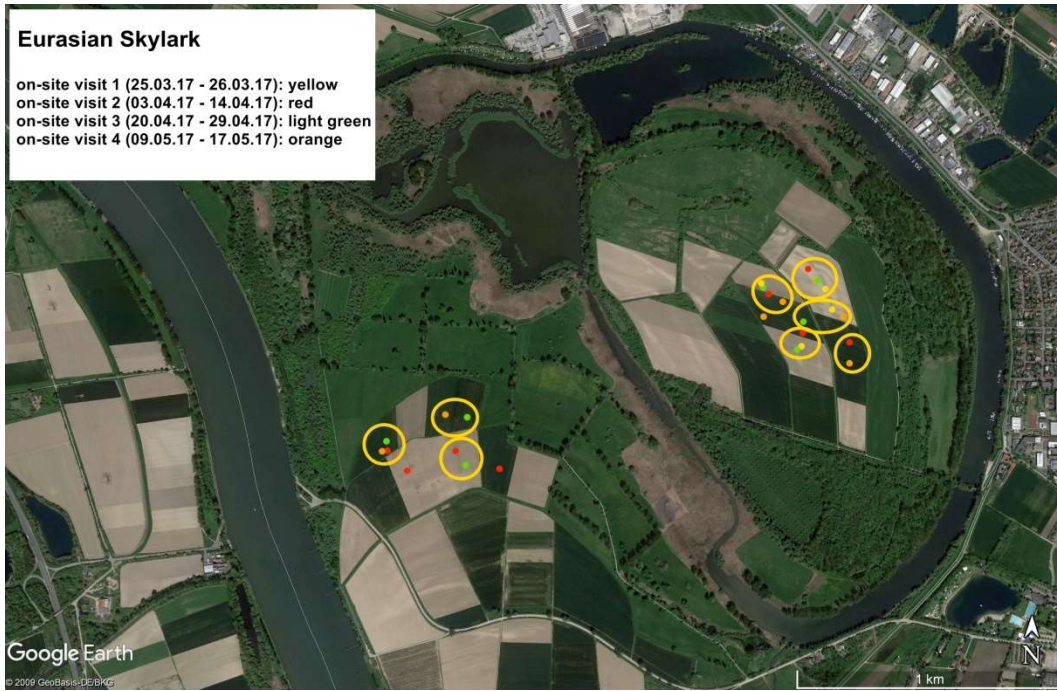

**Figure S3.** Species map for Eurasian Skylark with single detections and defined territories.

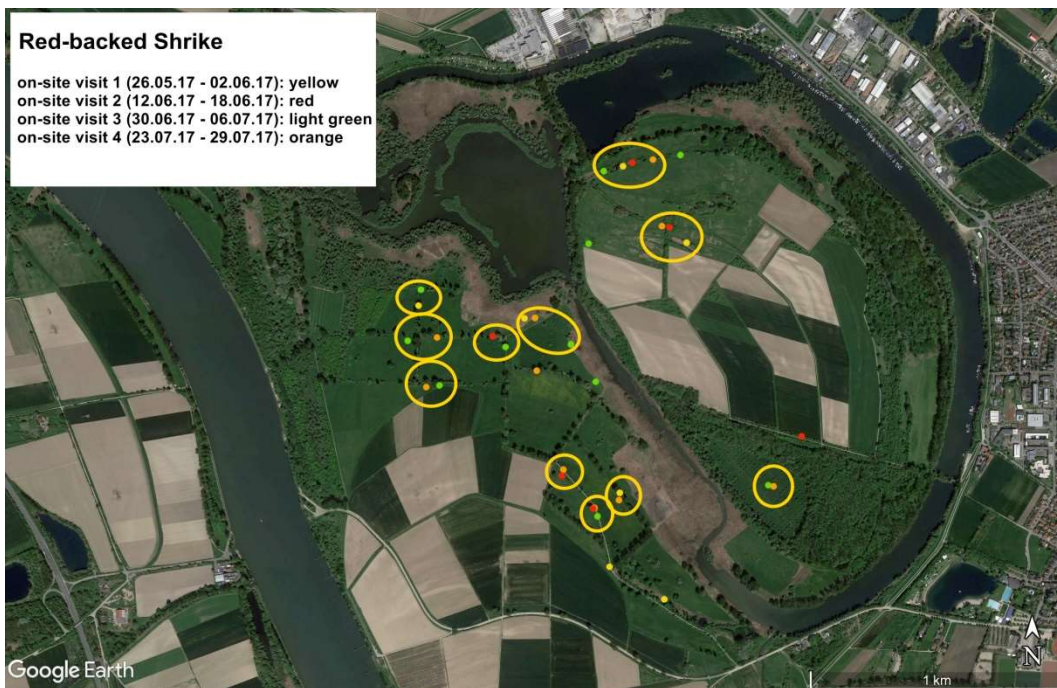

**Figure S4.** Species map for Red-backed Shrike with single detections and defined territories.

**Table S1.** Long-term (from 1974–1979 to 2017) and short-term (2003–2017) trends of breeding bird populations at "Lampertheimer Altrhein" (LA) in comparison with long-term (1985–2009) and short-term (1998–2009) trends for Germany (GER) [1] and long-term (1980–2011) and short-term (1990–2011) trends for Europe (EU) [2]. Every species is classified into categories of habitat use and food requirements. Species are sorted from negative to positive population developments in the long-term trend.

| Common Name<br>(IOC World Bird List) <sup>1</sup> | Habitat | Food <sup>2</sup> |   |   |   | Trends |       |      |       |      |       |
|---------------------------------------------------|---------|-------------------|---|---|---|--------|-------|------|-------|------|-------|
|                                                   |         | H                 | I | V | O | LA     | LA    | GER  | GER   | EU   | EU    |
|                                                   |         |                   |   |   |   | Long   | Short | Long | Short | Long | Short |
|                                                   |         |                   |   |   |   | Term   | Term  | Term | Term  | Term | Term  |
| Marsh Warbler                                     | OL      | X                 |   |   |   | ↓↓     |       | ↕    |       | →    |       |
| Willow Warbler                                    | WO      | X                 |   |   |   | ↓↓     |       | ↓    |       | ↓    |       |
| Common Moorhen                                    | WE      |                   |   |   | X | ↓↓     |       | ↗    |       | →    |       |
| Fieldfare                                         | WO      | X                 |   |   |   | ↓↓     |       | ↓    |       | →    |       |
| Common Redstart                                   | OL      | X                 |   |   |   | ↓↓     | ↓↓    | ↗    | ↘     | ↑    | ↑     |
| Tree Pipit                                        | OL      | X                 |   |   |   | ↓↓     |       | ↓↓   |       | ↓    |       |
| Grey Heron                                        | WE      |                   |   | X |   | ↓↓     | ↓↓    | ↑    | ↕     | ↑    | ↑     |
| Willow Tit                                        | WO      | X                 |   |   |   | ↓↓     |       | ↘    |       | ↓    |       |
| Little Owl                                        | OL      | X                 | X |   |   | ↓↓     | ↓↓    | ↑    | ↑     |      |       |
| Great Reed Warbler                                | WE      | X                 |   |   |   | ↓↓     |       | ↑    |       | →    |       |
| White Wagtail                                     | OH      | X                 |   |   |   | ↓↓     |       | ↓    |       | →    |       |
| Common Grasshopper Warbler                        | OL      | X                 |   |   |   | ↓↓     | ↓↓    | ↓    | ↓     | →    | ↓     |

|                           |    |    |   |   |   |    |    |    |     |
|---------------------------|----|----|---|---|---|----|----|----|-----|
| Water Rail                | WE |    | X | X |   | ↓↓ |    | →  |     |
| Long-eared Owl            | WO |    |   | X |   | ↓↓ | ↓↓ | ↕  | ↕   |
| Eurasian Magpie           | OL |    |   |   | X | ↓↓ |    | ↘  | ↓   |
| Little Grebe              | WE |    | X |   |   | ↓↓ |    | →  |     |
| Common Linnet             | OL | X* |   |   |   | ↓↓ |    | ↓↓ | ↓   |
| Little Bittern            | WE |    | X | X |   | ↓↓ |    | →  |     |
| Sedge Warbler             | WE |    | X |   |   | ↓↓ |    | ↑  | →   |
| Corn Bunting              | OL | X* | X |   |   | ↓↓ |    | ↑  |     |
| Eurasian Collared Dove    | OH | X* |   |   |   | ↓↓ |    | ↓  | ↑   |
| Western Jackdaw           | OH |    |   |   | X | ↓↓ |    | →  | → → |
| Northern Lapwing          | OL | X* | X |   |   | ↓↓ |    | ↓↓ | ↓   |
| Black-crowned Night Heron | WE |    | X | X |   | ↓↓ |    | ↑  |     |
| Purple Heron              | WE |    | X | X |   | ↓↓ |    | →  |     |
| Savi's Warbler            | WE |    | X |   |   | ↓↓ |    | →  |     |
| Lesser Whitethroat        | WO |    | X |   |   | ↓↓ |    | ↕  | →   |
| Wood Warbler              | WO |    | X |   |   | ↓↓ |    | ↓↓ | ↓   |
| House Sparrow             | OH | X* | X |   |   | ↓↓ |    | ↘  | ↓   |
| Little Crake              | WE |    | X |   |   | ↓↓ |    | ↑  |     |

|                       |    |    |   |   |   |   |   |   |   |   |
|-----------------------|----|----|---|---|---|---|---|---|---|---|
| Corn Crane            | WE | X  |   |   | ⇓ |   |   | → |   |   |
| Little Ringed Plover  | WE | X  |   |   | ⇓ |   |   | → |   |   |
| River Warbler         | WE | X  |   |   | ⇓ |   | ↑ |   | ↓ |   |
| Garganey              | WE | X  | X |   | ⇓ |   | ↓ |   |   |   |
| Swan Goose            | WE | X  |   |   |   | ⇓ |   | ⇓ |   |   |
| Yellow-legged Gull    | WE | X  | X |   |   | ⇓ |   | ↑ |   |   |
| Common Reed Bunting   | WE | X  |   |   | ⇓ |   | ↕ |   | ↓ |   |
| Eurasian Coot         | WE |    |   | X | ⇓ |   | ↕ |   | ↑ |   |
| Eurasian Tree Sparrow | OL | X* | X |   | ⇓ |   | ↓ |   | ↓ |   |
| European Turtle Dove  | OL | X* |   |   | ⇓ | ⇓ | ↓ | ⇓ | ↓ | ↓ |
| European Greenfinch   | WO | X* | X |   | ⇓ |   | ↘ |   | ↑ |   |
| Great Crested Grebe   | WE | X  | X |   | ⇓ | → | → | ↑ |   | → |
| European Reed Warbler | WE | X  |   |   | ⇓ | ⇓ | ↑ | ↕ | → | → |
| Common Starling       | OL | X  |   |   | ⇓ |   | ↓ |   | ↓ |   |
| Dunnock               | WO | X  |   |   | ⇓ |   | ↘ |   | ↓ |   |
| Carrion Crow          | OL |    |   | X | ⇓ |   | ↗ |   | ↑ |   |
| Common Blackbird      | WO |    |   | X | ⇓ |   | → |   | ↑ |   |
| Eurasian Wren         | WO | X  |   |   | ⇓ |   | ↑ |   | ↑ |   |

|                           |    |    |   |   |    |    |    |    |    |    |
|---------------------------|----|----|---|---|----|----|----|----|----|----|
| Eurasian Skylark          | OL |    | X |   | ↓↓ | ↑  | ↘  | ↓↓ | ↓  | ↓  |
| Common Nightingale        | WO |    | X |   | ↓  |    | ↑  |    | ↓  |    |
| Grey Partridge            | OL | X* | X |   | ↓  | ↓  | ↓↓ | ↘  | ↓↓ | ↓↓ |
| Garden Warbler            | WO |    | X |   | ↓  |    | ↘  |    | ↓  |    |
| European Robin            | WO |    | X |   | ↓  |    | ↘  |    | ↑  |    |
| Mallard                   | WE |    |   | X | ↓  |    | ↕  |    | ↑  |    |
| Bluethroat                | WE |    | X |   | ↓  | ↓↓ | ↑  | ↑  |    |    |
| European Goldfinch        | OL | X* |   |   | ↓  |    | ↓  |    | ↑  |    |
| Icterine Warbler          | WO |    | X |   | ↓  | ↓  | ↕  | ↓↓ | ↓  | ↓  |
| Common Wood Pigeon        | OL | X* |   |   | ↓  |    | →  |    | ↑  |    |
| Common Cuckoo             | WO |    | X |   | ↓  |    | ↕  |    | ↓  |    |
| Common Kestrel            | OL |    | X | X | ↓  |    | →  |    | ↓  |    |
| Eurasian Golden Oriole    | WO |    | X |   | ↓  | ↓  | ↕  | ↗  | →  | →  |
| Song Thrush               | WO |    | X |   | ↓  |    | →  |    | ↑  |    |
| Eurasian Blackcap         | WO |    | X |   | ↓  |    | ↑  |    | ↑  |    |
| Eurasian Blue Tit         | WO |    | X |   | ↓  |    | ↕  |    | ↑  |    |
| Common Chiffchaff         | WO |    | X |   | ↓  |    | ↘  |    | ↑  |    |
| Lesser Spotted Woodpecker | WO |    | X |   | ↓  | →  | ↕  | ↕  |    |    |

|                           |    |    |   |   |   |    |   |    |   |   |
|---------------------------|----|----|---|---|---|----|---|----|---|---|
| Short-toed Treecreeper    | WO |    | X |   | ↓ |    | ↕ |    | ↑ |   |
| Great Tit                 | WO |    | X |   | ↓ |    | → |    | ↑ |   |
| Common Whitethroat        | OL |    | X |   | → | ↓  | ↗ | ↕  | ↑ | → |
| Black Kite                | OL |    |   | X | → | ↓↓ | ↑ | ↗  |   |   |
| Common Chaffinch          | WO |    | X |   | → |    | → |    | ↑ |   |
| Common Buzzard            | OL |    |   | X | → |    | ↗ |    | ↑ |   |
| Long-tailed Tit           | WO |    | X |   | → |    | ↕ |    | → |   |
| Grey-headed Woodpecker    | WO |    | X |   | → | ↑  | ↘ | ↓↓ |   | → |
| Tawny Owl                 | WO |    |   | X | → | ↑  | ↘ | ↕  |   |   |
| Yellowhammer              | OL | X* | X |   | ↑ |    | → |    | ↓ |   |
| Spotted Flycatcher        | WO |    | X |   | ↑ |    | ↘ |    | ↓ |   |
| Great Spotted Woodpecker  | WO |    | X |   | ↑ |    | ↗ |    | ↑ |   |
| Eurasian Jay              | WO |    |   | X | ↑ |    | → |    | ↑ |   |
| European Green Woodpecker | WO |    | X |   | ↑ | ↑  | ↑ | ↑  | ↑ | ↑ |
| Eurasian Nuthatch         | WO |    | X |   | ↑ |    | ↕ |    | ↑ |   |
| Western Yellow Wagtail    | OL |    | X |   | ↑ | ↑  | ↗ | ↘  | ↓ | → |
| Common Kingfisher         | WE |    | X | X | ↑ | →  | ↑ | ↑  |   |   |
| European Pied Flycatcher  | WO |    | X |   | ↑ |    | ↓ |    | ↓ |   |

|                           |    |    |   |   |   |   |    |   |   |   |
|---------------------------|----|----|---|---|---|---|----|---|---|---|
| Gadwall                   | WE | X  |   |   | ↑ | ↑ | ↑  | ↑ |   |   |
| Western Marsh Harrier     | WE |    |   | X | ↑ | ↑ | ↘  | → | ↑ | → |
| Black Woodpecker          | WO |    | X |   | ↑ | ↑ | ↑  | ↕ | ↑ | → |
| Middle Spotted Woodpecker | WO |    | X |   | ↑ | → | ↗  | ↑ |   | → |
| Mute Swan                 | WE | X  |   |   | ↑ |   | ↑  |   | ↑ |   |
| Hawfinch                  | WO | X* |   |   | ↑ |   | ↓  |   | ↑ |   |
| Canada Goose              | WE | X  |   |   | ↑ | ↓ | ↑  | ↑ |   |   |
| Eurasian Hobby            | OL |    | X | X | ↑ | → | ↗  | ↑ |   |   |
| European Serin            | OL | X* |   |   | ↑ |   | ↓↓ |   |   | ↓ |
| Red Kite                  | OL |    |   | X | ↑ |   | ↓  |   |   |   |
| Eurasian Treecreeper      | WO |    | X |   | ↑ |   | ↘  |   |   | → |
| Greylag Goose             | WE | X  |   |   | ↑ | ↑ | ↑  | ↑ |   |   |
| Stock Dove                | WO | X* |   |   | ↑ | ↑ | ↑  | ↗ | ↑ | → |
| Egyptian Goose            | WE | X  |   |   | ↑ |   | ↑  |   |   |   |
| Marsh Tit                 | WO |    | X |   | ↑ |   | ↕  |   |   | ↓ |
| Red-backed Shrike         | OL |    | X | X | ↑ | ↑ | ↕  | ↘ | → | → |
| Great Cormorant           | WE |    |   | X | ↑ | ↓ | ↑  | ↑ |   |   |



**Symbols and abbreviations:** <sup>1</sup> Source: IOC World Bird List Version 7.3 (www.worldbirdnames.org); <sup>2</sup> Classification according to the main diet of adults and nestlings during the breeding period; \* granivorous species in the category "herbivorous species"; WE: Wetland birds; OL: Birds of open cultivated landscapes; WO: Woodland birds; OH: Other habitats; H: Herbivorous species; I: Mainly insectivorous species; V: Vertebrate consumer; O: Omnivorous species

| <b>Trends Lampertheimer Altrhein (LA)</b>                                                                                                                                                                                                                            | <b>Trends Germany (GER)</b>                                                                                                                                                                                                                           | <b>Trends Europe (EU)</b>                                                                                                                                                                                                                                                                                                                                                   |
|----------------------------------------------------------------------------------------------------------------------------------------------------------------------------------------------------------------------------------------------------------------------|-------------------------------------------------------------------------------------------------------------------------------------------------------------------------------------------------------------------------------------------------------|-----------------------------------------------------------------------------------------------------------------------------------------------------------------------------------------------------------------------------------------------------------------------------------------------------------------------------------------------------------------------------|
| <p>↓↓ strong decline (&gt; 75% within the reference period)</p> <p>↓ moderate decline (&gt; 25–75% within the reference period)</p> <p>→ stable (≤ 25% increase or decline within the reference period)</p> <p>↑ increase (&gt; 25% within the reference period)</p> | <p>↓↓ strong decline (&gt; 3% per year)</p> <p>↓ moderate decline (&gt; 1–3% per year)</p> <p>↘ slight decline (≤ 1% per year)</p> <p>↕ fluctuating</p> <p>→ stable</p> <p>↗ slight increase (≤ 1% per year)</p> <p>↑ increase (&gt; 1% per year)</p> | <p>↓↓ strong decline (decline significantly more than 5% per year)</p> <p>↓ moderate decline (significant decline, but not significantly more than 5% per year)</p> <p>→ stable (no significant increase or decline, and most probable trends are less than 5% per year)</p> <p>↑ moderate increase (significant increase, but not significantly more than 5% per year)</p> |

## References

1. Sudfeldt, C.; Dröschmeister, R.; Frederking, W.; Gedeon, K.; Gerlach, B.; Grüneberg, C.; Karthäuser, J.; Langgemach, T.; Schuster, B.; Trautmann, S.; Wahl, J. *Vögel in Deutschland-2013*; Dachverband Deutscher Avifaunisten e.V., Bundesamt für Naturschutz, Länderarbeitsgemeinschaft der Vogelschutzwarten: Münster, Germany, 2013; ISBN 978-3-9815543-1-1.
2. Pan-European Common Bird Monitoring Scheme. *Population Trends of Common European Breeding Birds 2013*; Czech Society for Ornithology: Prague, Czech Republic, 2013.
